# Supplementary material for: Development of a Geriatric Oral Health Vulnerability Score (GOHVS) and Its Association with Functional Tooth Loss in Older Adults: A Cross-Sectional Study
Source: Research Square preprint supplement (doi:10.21203/rs.3.rs-8507381/v1), 2026-02-09
Supplement: Supplementary file 1 [file aca2b862ab386609b8894029.pdf]

## **Supplementary File 1. Geriatric Oral Health Vulnerability Score (GOHVS)**

### Questions and scoring criteria

1. How often do you brush your teeth?

- ☐ Less than twice daily (1 point)
- ☐ Twice daily or more (0 points)

2. Do you regularly use any interdental cleaning aids (e.g. dental floss, interdental brushes, water flossers)?

- ☐ No (1 point)
- ☐ Yes (0 points)

3. How often do you usually visit a dentist?

- ☐ Less than once per year (1 point)
- ☐ At least once per year (0 points)

4. Do you currently smoke tobacco?

- ☐ Yes (1 point)
- ☐ No (0 points)

5. Have you been diagnosed by a physician with two or more chronic systemic diseases?

- ☐ Yes (1 point)
- ☐ No (0 points)

### Score calculation

The GOHVS is calculated as the sum of all item scores (range: 0 - 5). Higher scores indicate greater oral health vulnerability and a higher likelihood of functional tooth loss, defined as having fewer than 20 remaining natural teeth.

### Intended use

The GOHVS is intended for use as a screening tool in geriatric dental care and research settings. It does not replace comprehensive clinical examination or diagnostic assessment. External validation in independent populations is required before wider clinical implementation.
